# Supplementary material for: Bridging the Data Gap: Enhancing the Spatiotemporal Accuracy of Hourly PM2.5 Concentration through the Fusion of Satellite-Derived Estimations and Station Observations
Source: MDPI journal article supplement (doi:10.3390/rs15204973), 2023-10-15
Supplement: s1 [file s1]

Archive with 1 entries (1 files):
- remotesensing-2638076-supplementary.pdf
